# Supplementary material for: Predictors of mortality following primary hip and knee replacement in the aged: A single-center analysis of 1,998 primary hip and knee replacements for primary osteoarthritis
Source: PubMed Central journal article supplement — Acta Orthop. 2013 Feb 26;84(1):44–53. doi: 10.3109/17453674.2012.752691 (PMC3584602; doi:10.3109/17453674.2012.752691), 2013-02-26
Supplement: ORT-84-44-s5608.pdf [file ORT-84-44-s5608.pdf]

## Supplementary article data

# Predictors of mortality following primary hip and knee replacement in the aged

## A single-center analysis of 1,998 primary hip and knee replacements for primary osteoarthritis

Esa Jämsen<sup>1,2</sup>, Timo Puolakka<sup>1</sup>, Antti Eskelinen<sup>1</sup>, Pirkko Jäntti<sup>2,3</sup>, Jarkko Kalliovalkama<sup>1</sup>, Jyrki Nieminen<sup>1</sup>, and Jaakko Valvanne<sup>2</sup>

<sup>1</sup>Coxa, Hospital for Joint Replacement; <sup>2</sup>School of Medicine, University of Tampere, Tampere; <sup>3</sup>Geriatric Unit, Seinäjoki Central Hospital, Seinäjoki, Finland.

Correspondence: esa.jamsen@uta.fi

Submitted 12-04-24. Accepted 12-09-18

Appendix. The association of patient characteristics, preoperative clinical state, and operative data, with overall mortality following in univariate analysis. The results are presented as hazard ratios (HR; calculated with use of Cox regression analysis) with their 95% confidence intervals (CI)

|                                                    | Overall mortality<br>HR (95% CI) |                                                                                                                                          | Overall mortality<br>HR (95% CI) |
|----------------------------------------------------|----------------------------------|------------------------------------------------------------------------------------------------------------------------------------------|----------------------------------|
| <i>Patient characteristics</i>                     |                                  | Renal function                                                                                                                           | 1.06 (0.97–1.14)                 |
| Age (increase of 1 year)                           | 1.13 (1.10–1.16)                 | Normal                                                                                                                                   | 1                                |
| Age group                                          |                                  | Mild insufficiency                                                                                                                       | 1.90 (0.91–3.97)                 |
| 75–79 years                                        | 1                                | Moderate insufficiency                                                                                                                   | 2.03 (0.96–4.30)                 |
| 80–84 years                                        | 1.76 (1.35–2.29)                 | Severe insufficiency                                                                                                                     | 6.39 (1.92–21.24)                |
| ≥ 85 years                                         | 3.41 (2.47–4.71)                 | <i>Operative data</i>                                                                                                                    |                                  |
| Sex                                                |                                  | Operated joint                                                                                                                           |                                  |
| Female                                             | 1                                | Hip                                                                                                                                      | 1.10 (0.87–1.40)                 |
| Male                                               | 1.59 (1.25–2.04)                 | Knee                                                                                                                                     | 1                                |
| Body mass index (increase of 1 kg/m <sup>2</sup> ) | 0.96 (0.93–0.99)                 | Laterality                                                                                                                               |                                  |
| < 20 kg/m <sup>2</sup>                             | 1.19 (0.49–2.01)                 | Unilateral                                                                                                                               | 1                                |
| 20–24 kg/m <sup>2</sup>                            | 1.50 (1.13–2.01)                 | Bilateral                                                                                                                                | 0.70 (0.43–1.12)                 |
| 25–30 kg/m <sup>2</sup>                            | 1                                | Type of knee replacement<br>(knee replacements only)                                                                                     |                                  |
| > 30 kg/m <sup>2</sup>                             | 0.84 (0.61–1.15)                 | Cruciate-retaining                                                                                                                       | 1                                |
| ASA risk score                                     |                                  | Cruciate-substituting                                                                                                                    | 1.46 (1.03–2.07)                 |
| II                                                 | 1                                | Constrained                                                                                                                              | 0.98 (0.44–2.17)                 |
| III                                                | 2.16 (1.62–2.87)                 | Hinge or other                                                                                                                           | 3.19 (1.15–8.87)                 |
| IV or V                                            | 3.87 (2.23–6.71)                 | Fixation method                                                                                                                          |                                  |
| Charnley class / Knee Society class                |                                  | Cemented                                                                                                                                 | 1                                |
| One hip/knee involved                              | 1                                | Hybrid                                                                                                                                   | 1.25 (0.86–1.83)                 |
| Both hips/knees involved                           | 0.99 (0.78–1.27)                 | Cementless                                                                                                                               | 0.56 (0.25–1.25)                 |
| Other reasons for restricted mobility              | 0.86 (0.44–1.69)                 | Duration of operation (unilateral procedures only)                                                                                       |                                  |
| <i>Preoperative clinical state</i>                 |                                  | ≤ 87 minutes                                                                                                                             | 1                                |
| Use of walking aids                                |                                  | 88–101 minutes                                                                                                                           | 0.98 (0.69–1.38)                 |
| None                                               | 1                                | 102–120 minutes                                                                                                                          | 0.87 (0.62–1.23)                 |
| Any                                                | 2.14 (1.54–2.98)                 | > 120 minutes                                                                                                                            | 1.01 (0.72–1.42)                 |
| Walking ability                                    |                                  | Blood loss per 100 ml                                                                                                                    | 1.03 (1.00–1.06)                 |
| Unable to walk                                     | 4.14 (1.88–9.13)                 | ≤ 200 ml                                                                                                                                 | 1                                |
| Indoors only                                       | 2.35 (1.63–3.39)                 | 201–500 ml                                                                                                                               | 1.21 (0.91–1.61)                 |
| Less than 1 km                                     | 1.27 (0.92–1.75)                 | 501–800 ml                                                                                                                               | 1.07 (0.75–1.53)                 |
| Over 1 km/unlimited                                | 1                                | > 800 ml                                                                                                                                 | 1.37 (0.91–2.05)                 |
| Preoperative clinical score (increase of 5 points) |                                  | Blood transfusion                                                                                                                        |                                  |
| Harris hip score                                   | 0.88 (0.83–0.94)                 | None                                                                                                                                     | 1                                |
| Knee Society score                                 | 0.92 (0.88–0.96)                 | Any                                                                                                                                      | 1.42 (1.10–1.83)                 |
| Severe osteoarthritis <sup>a</sup>                 |                                  | ASA, American Society of Anesthesiologists; GFR, estimated glomerular filtration rate;                                                   |                                  |
| No                                                 | 1                                | <sup>a</sup> Severe osteoarthritis is defined as presence of axial deformity of                                                          |                                  |
| Yes                                                | 1.43 (1.12–1.82)                 | > 10 degrees, range of motion < 80 degrees or severe antero-posterior or medio-lateral instability in knees, and as presence of positive |                                  |
| <i>Preoperative laboratory data</i>                |                                  | Trendelenburg sign, <100 total range of motion or severe limp.                                                                           |                                  |
| Anemia                                             | 2.02 (1.52–2.70)                 |                                                                                                                                          |                                  |
| GFR (decrease of 10 mL/min)                        |                                  |                                                                                                                                          |                                  |
